# Supplementary material for: Neuregulin-1 elicits a regulatory immune response following traumatic spinal cord injury
Source: PubMed Central journal article supplement (PMC5822667; doi:10.1186/s12974-018-1093-9), 2018-02-21

**A**

Uninjured stained

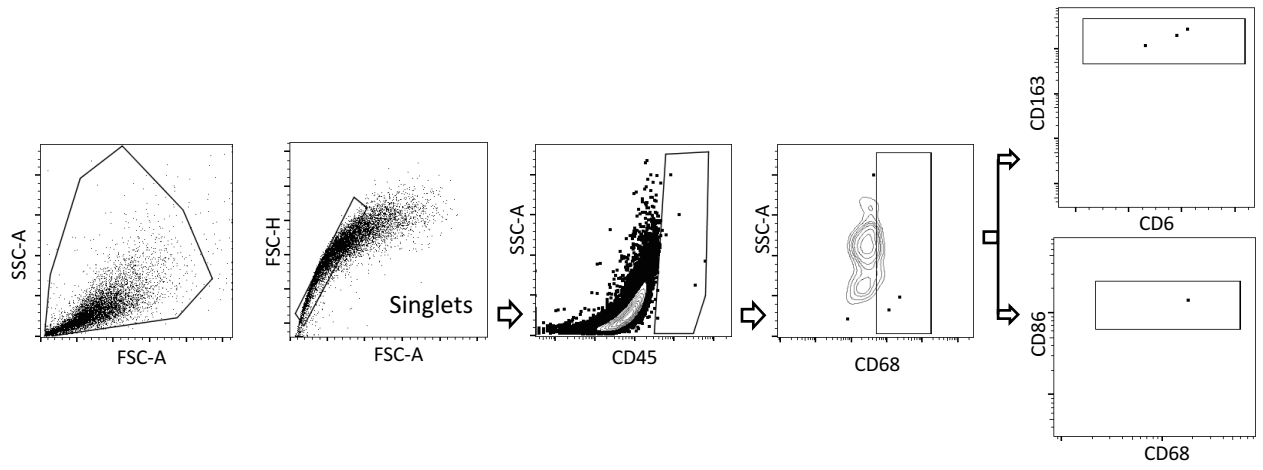**B**

Injured stained

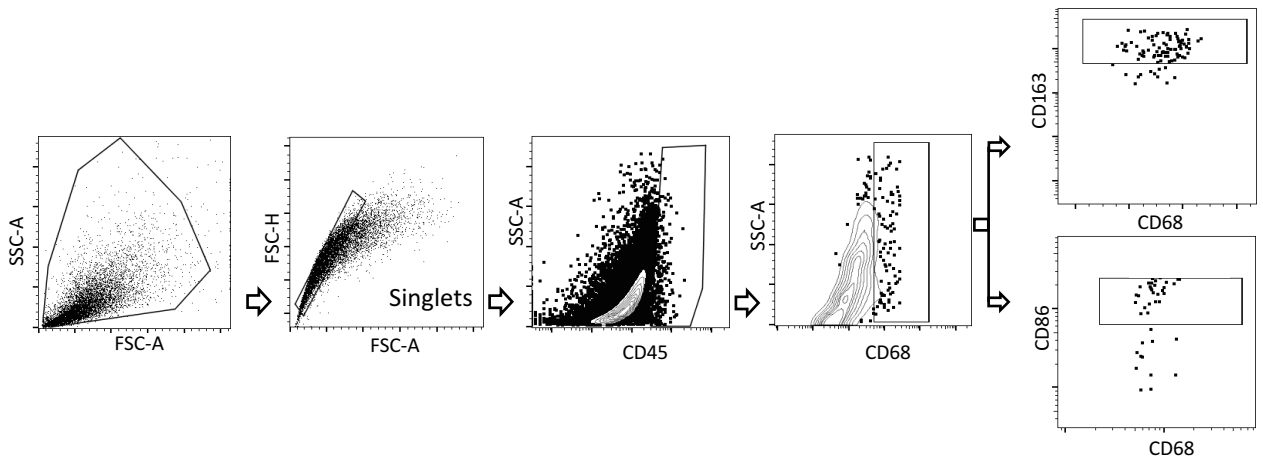**C**

Injured isotype control

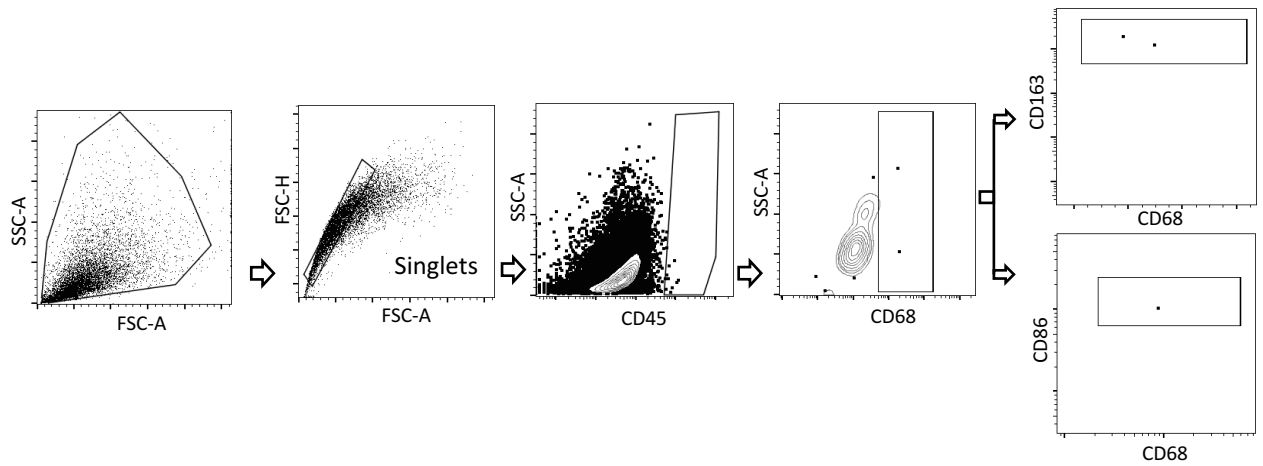**D**

Injured unstained

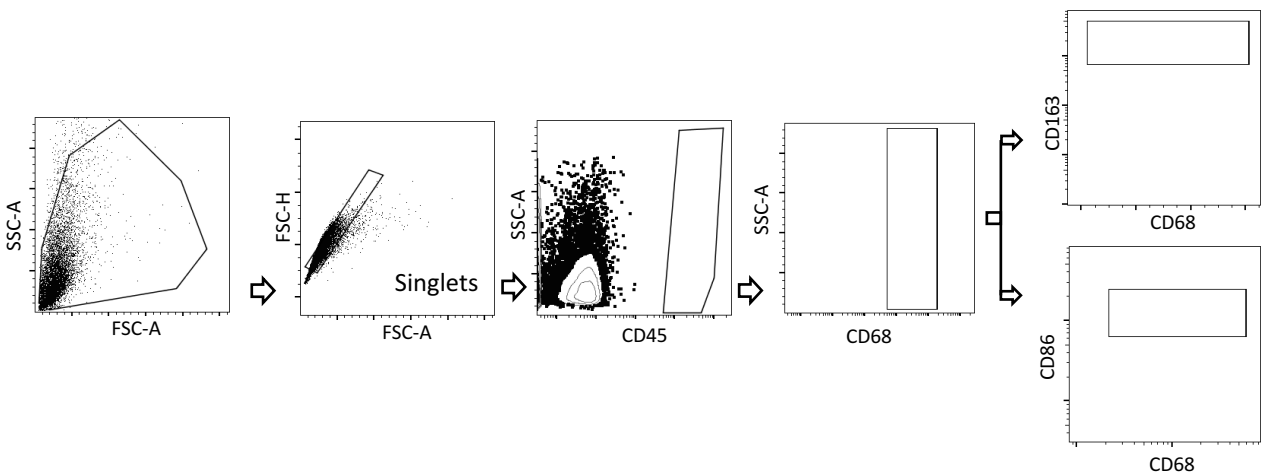

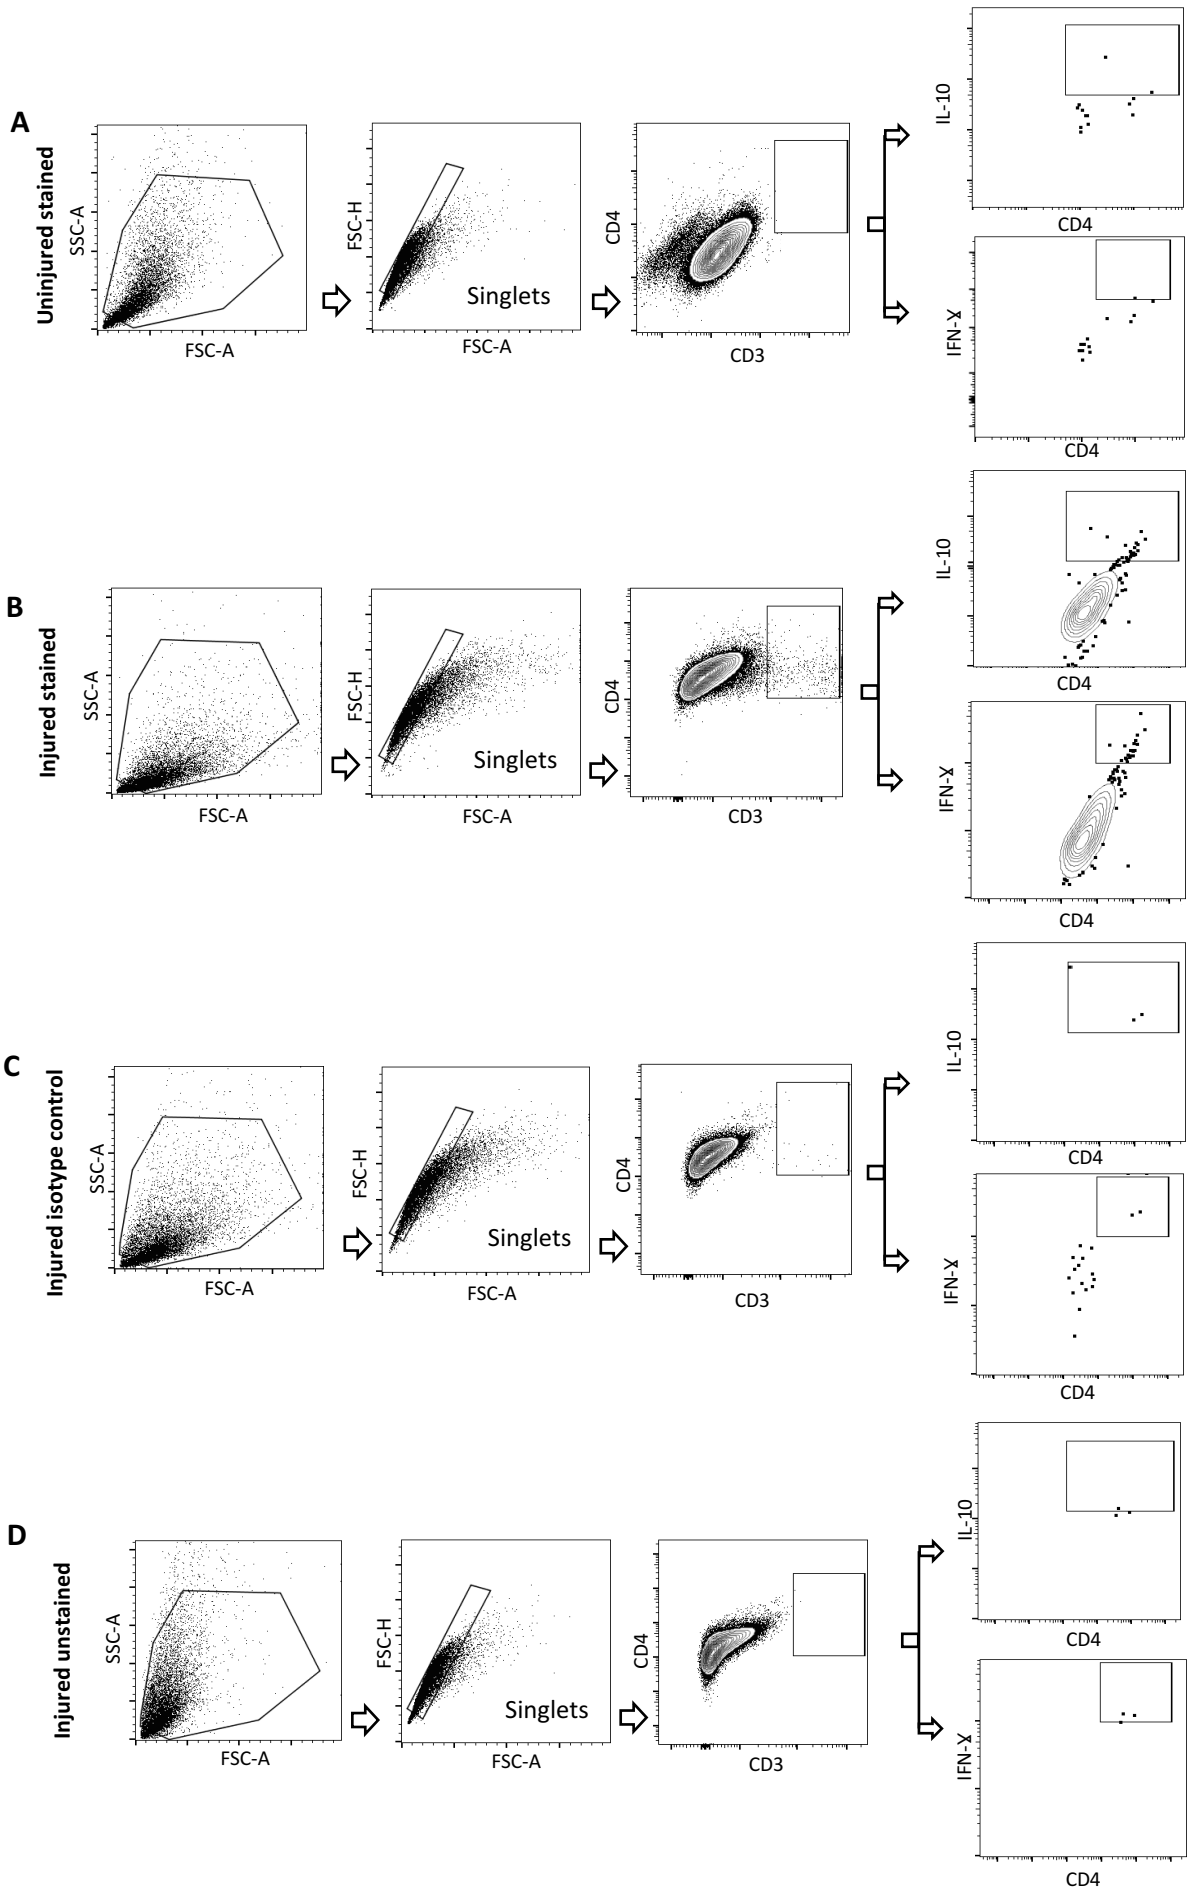

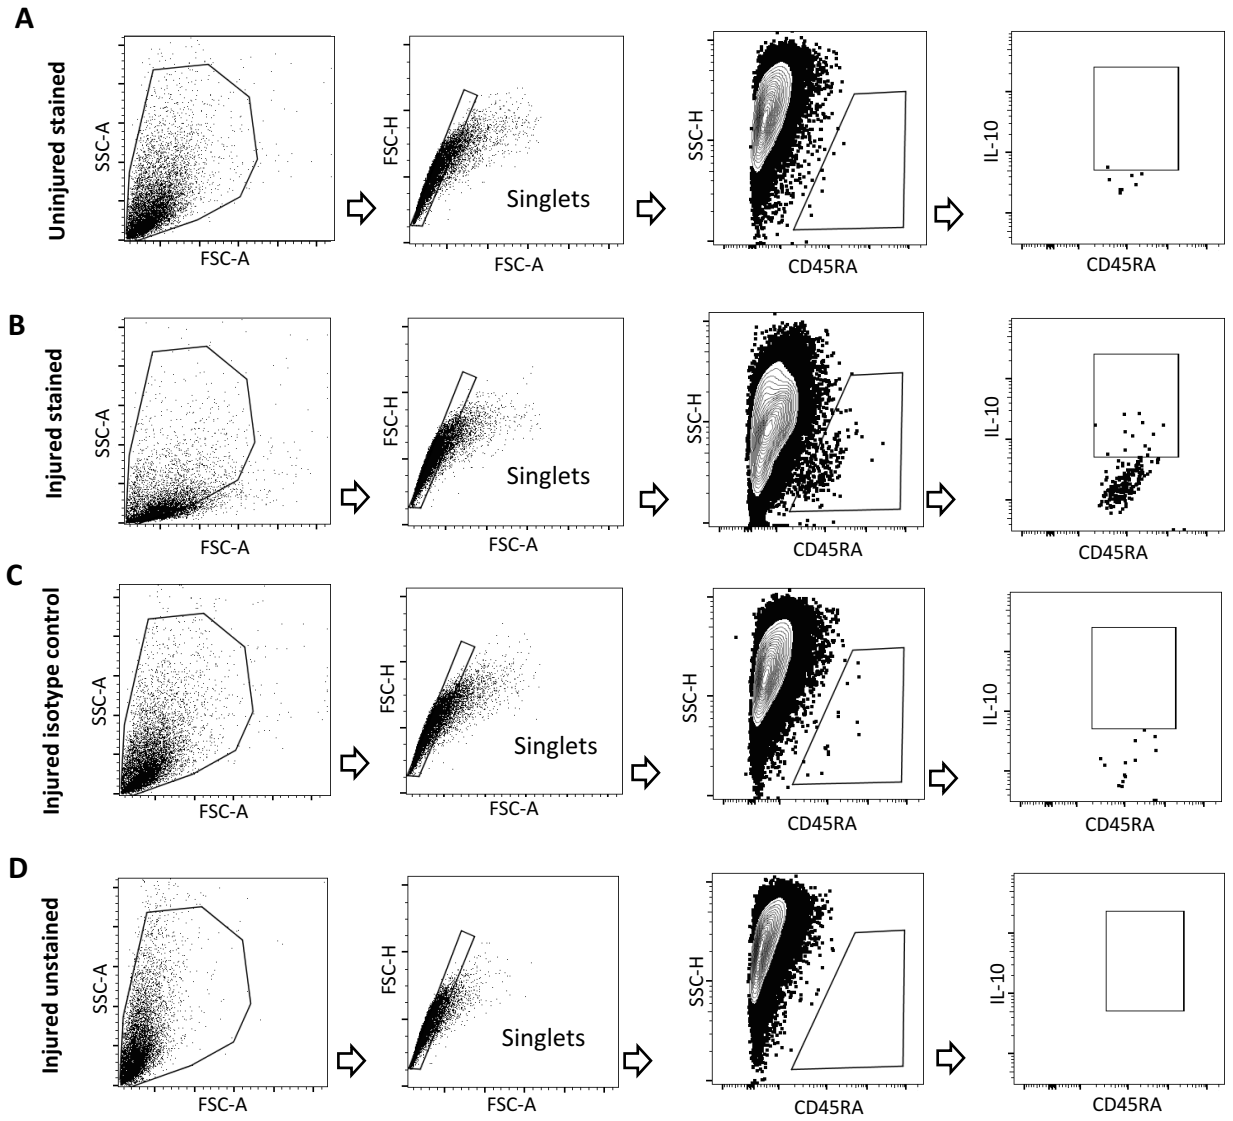

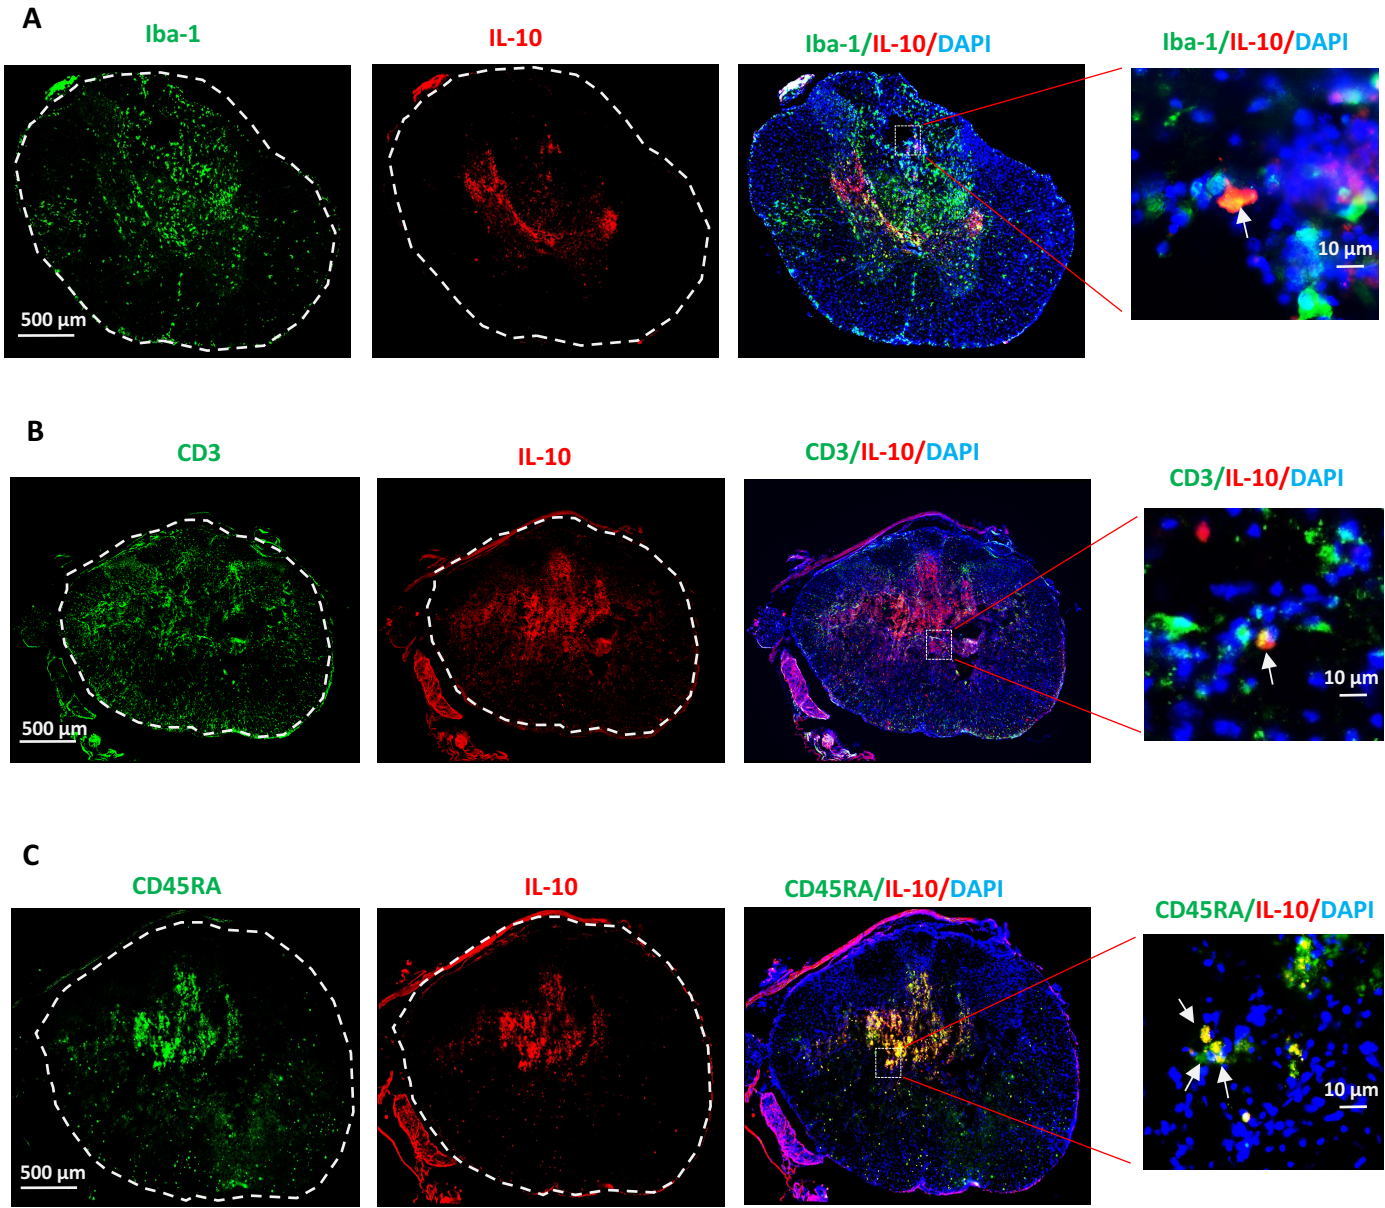

Supplement: 12974_2018_1093_MOESM1_ESM.pdf [file 12974_2018_1093_MOESM1_ESM.pdf]
